# Supplementary material
Source: Springer Nature journal article supplement (https://www.springermedizin.de/resource/supplementary/12960_2008_128_MOESM5_ESM.pdf/9570548)

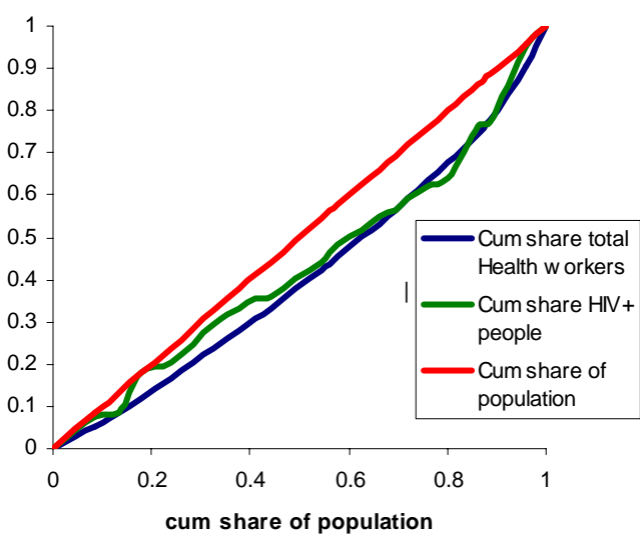

Supplement: MOESM5 [file 9570548]
